# Supplementary material
Source: publisher site journal article supplement (https://www.dovepress.com/article/401326)
Supplement: Supplementary file 1 [file get_supplementary_file.php]

Supplementary Material 1

TS=(Opiates OR "Opiate" OR "Opioid Peptides" OR "Opiate Peptides" OR "Opiate Peptide" OR "Opioid Peptide" OR "opioid" OR "opioids" OR "Endogenous Opiates" OR Dynorphins OR Dynorphin OR PDYN OR Endorphins OR Endorphin OR POMC OR "alpha-Endorphin" OR "α-Endorphin" OR "beta-Endorphin" OR "β-Endorphin" OR "gamma-Endorphin" OR "γ-Endorphin" OR Enkephalins OR Enkephalin OR PENK OR "nociceptin/orphanin FQ" OR PNOC OR alkaloids OR "Opiate Alkaloids" OR Morphinans OR Noscapine OR Papaverine OR "Opiate Receptors" OR "Opioid Receptor" OR "Opioid Receptors" OR "Opiate Receptor" OR "Enkephalin Receptor" OR "Enkephalin Receptors" OR "β-Endorphin Receptor" OR "beta Endorphin Receptor" OR "β-Endorphin Receptors" OR "Endorphin Receptor" OR "Endorphin Receptors" OR "delta Opioid Receptor" OR "delta Receptor" OR "delta Receptors" OR "delta Opioid Receptors" OR OPRD1 OR "kappa Opioid Receptors" OR "kappa Receptor" OR "kappa Receptors" OR "kappa Opioid Receptor" OR OPRK1 OR "mu Opioid Receptors" OR "mu Receptor" OR "mu Receptors" OR "mu Opioid Receptor" OR OPRM1 OR "orphanin FQ receptor" OR "orphanin FQ receptors" OR "OFQ receptor" OR "OFQ receptors" OR OPRL1 OR "Morphine Receptor" OR "Morphine Receptors") AND TS=("macrophage" OR neutrophil OR "NK cell" OR "natural killer cell" OR "dendritic cell" OR "DC" OR "innate lymphoid cells" OR "ILCs" OR "T cell" OR "T lymphocyte" OR "B cell" OR "B lymphocyte" OR "regulatory T cell" OR "Treg" OR "monocyte" OR "immunosuppression" OR "immune dysfunction" OR "immune response")
